# Supplementary material for: Mass Spectrometry-based Absolute Quantification of 20S Proteasome Status for Controlled Ex-vivo Expansion of Human Adipose-derived Mesenchymal Stromal/Stem Cells
Source: PubMed Central journal article supplement (PMC6442357; doi:10.1074/mcp.ra118.000958), 2019-01-30

# Sup Figure 1

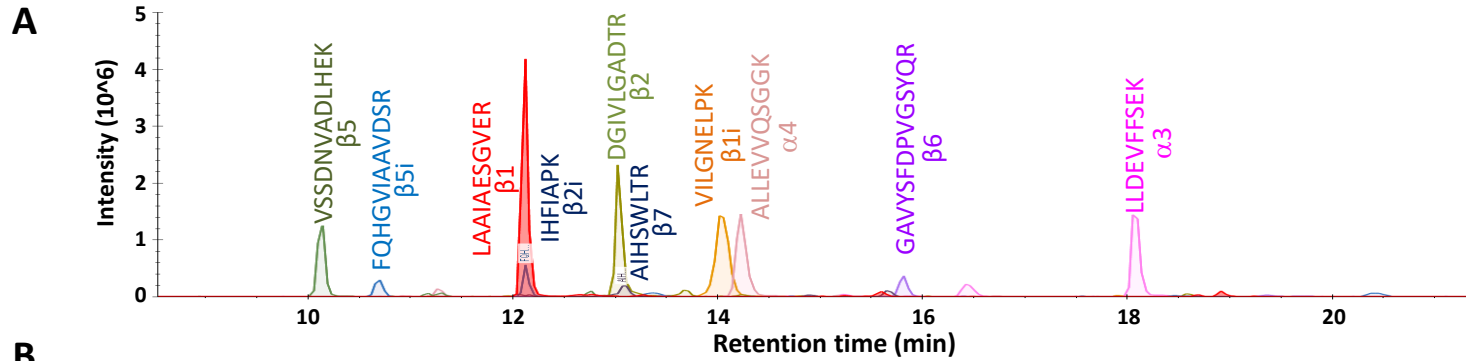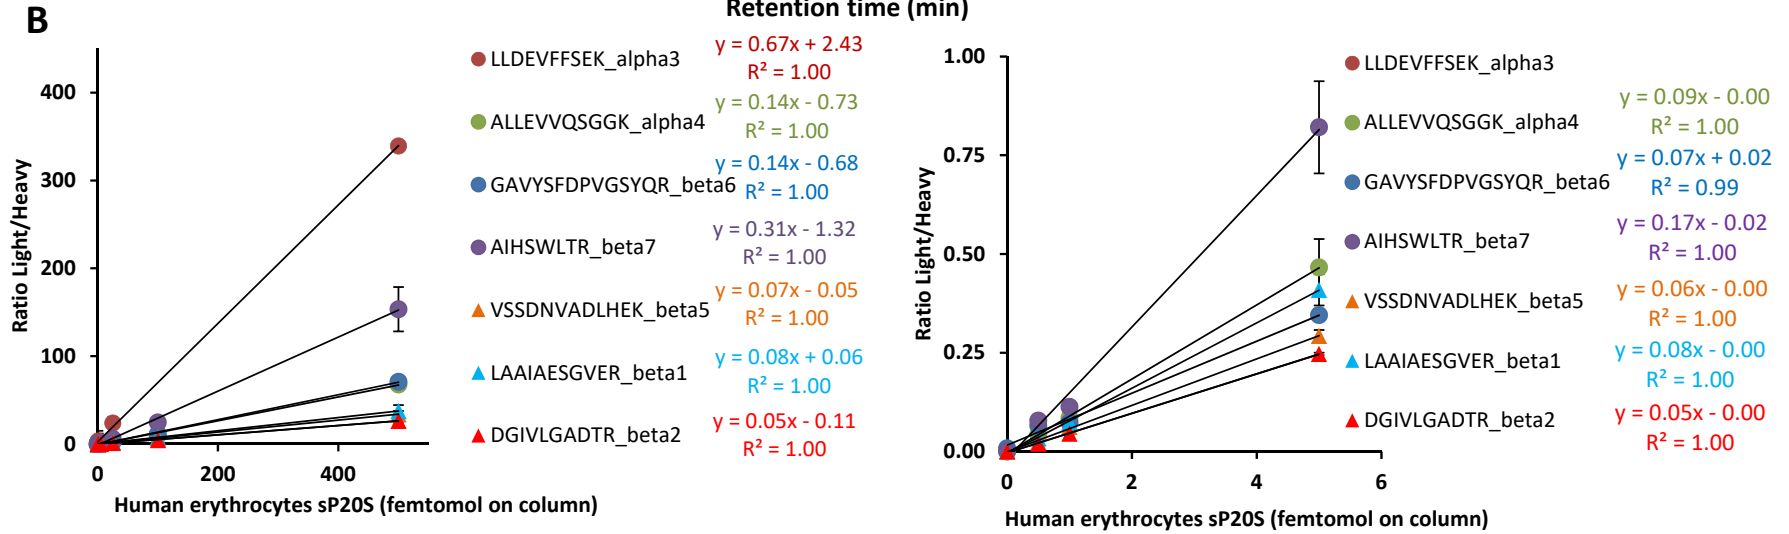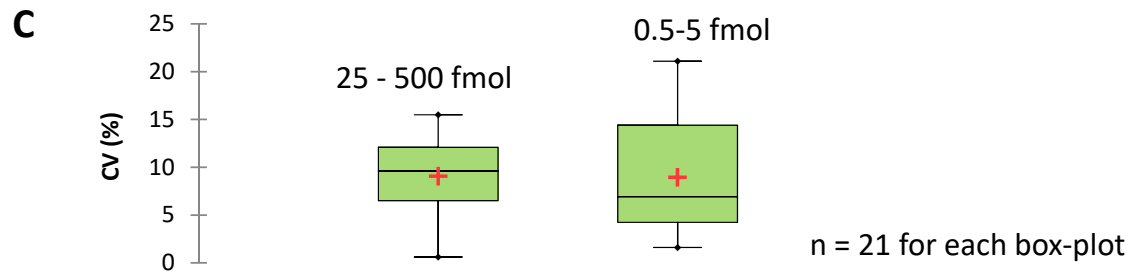

## Sup Figure 2

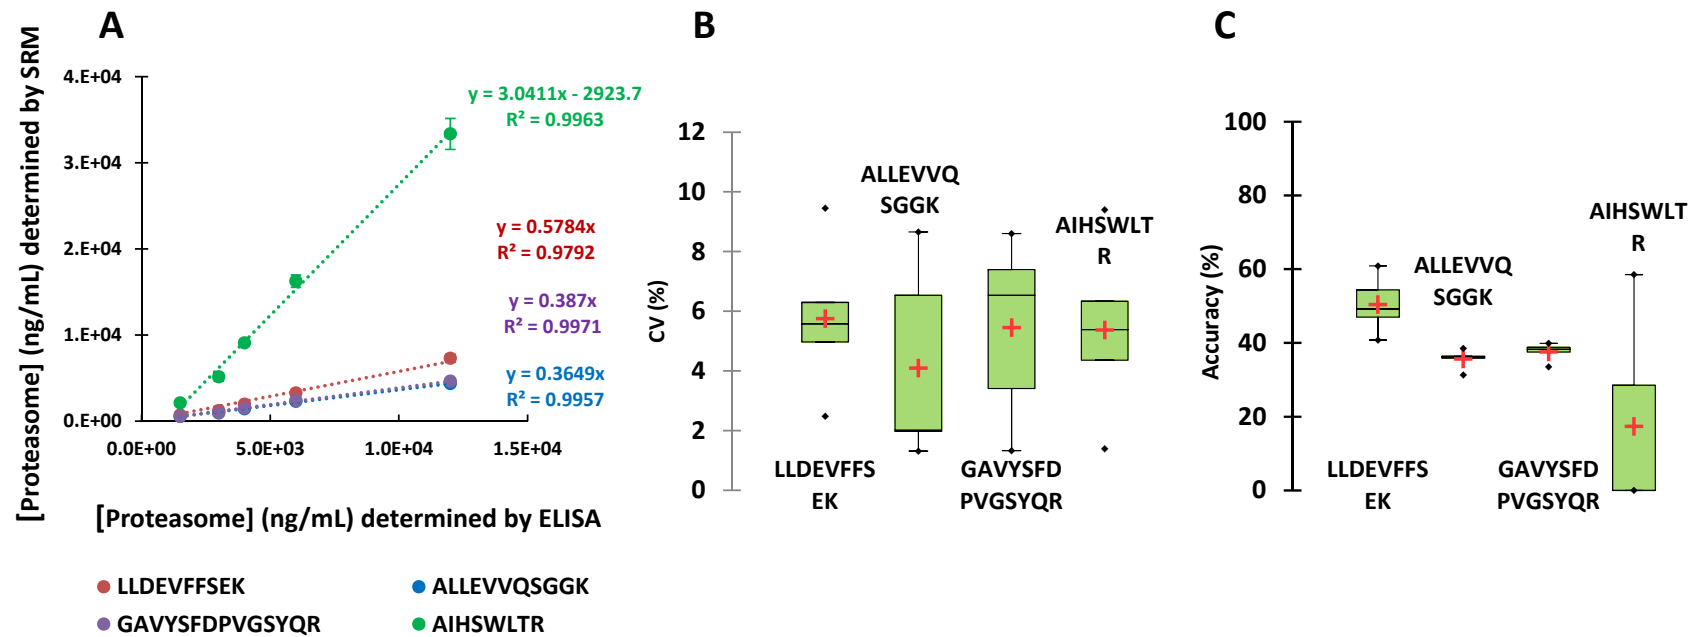

### Sup Figure 3

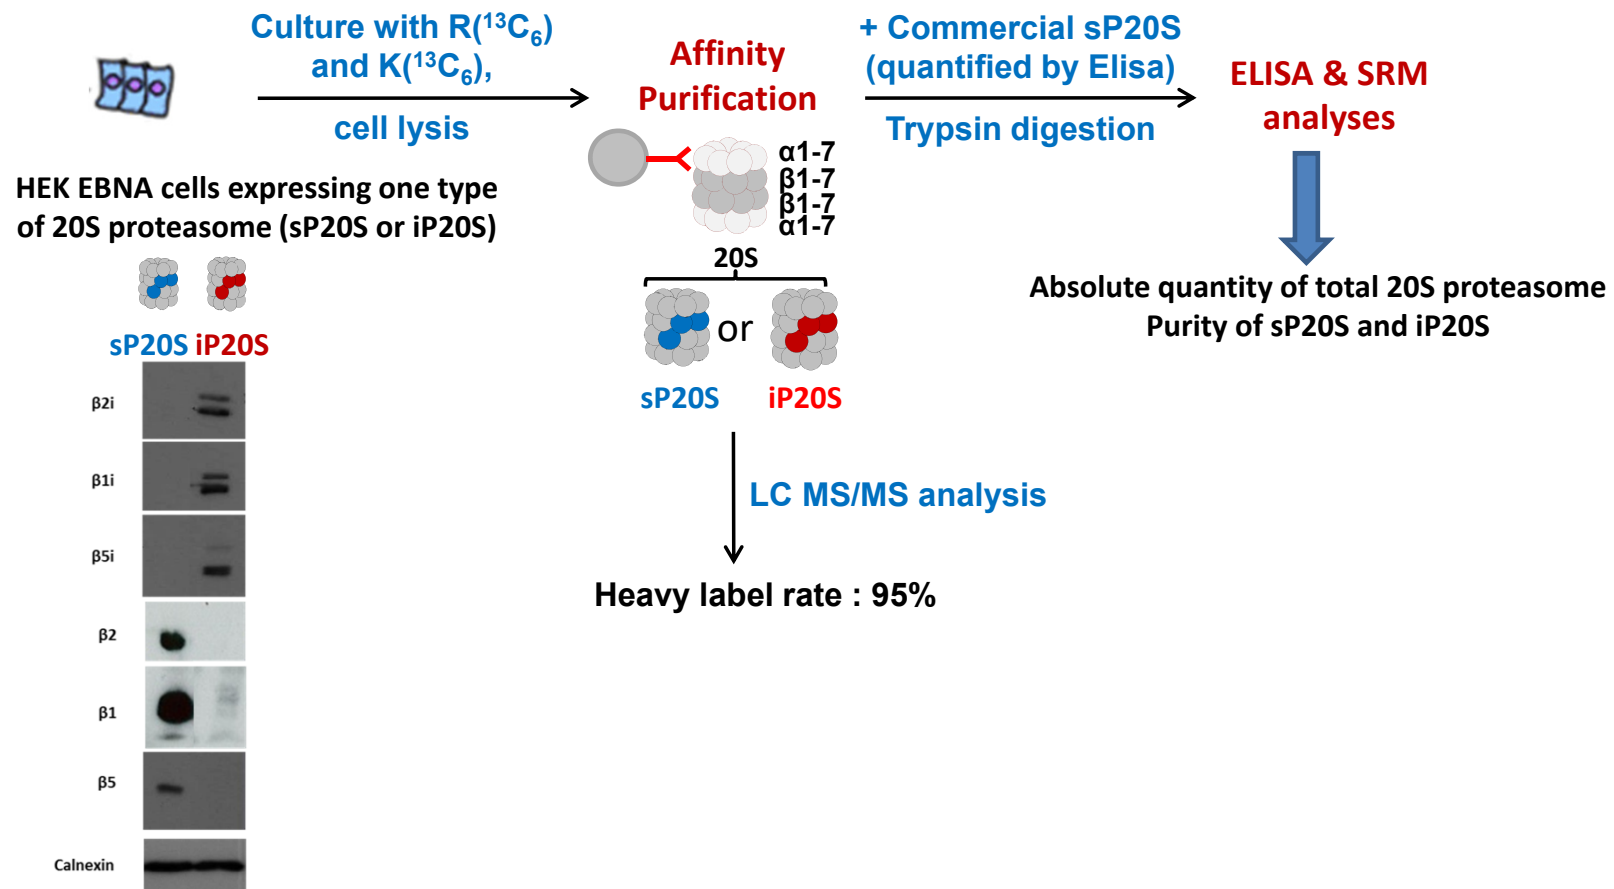

# Sup Figure 4

**A**

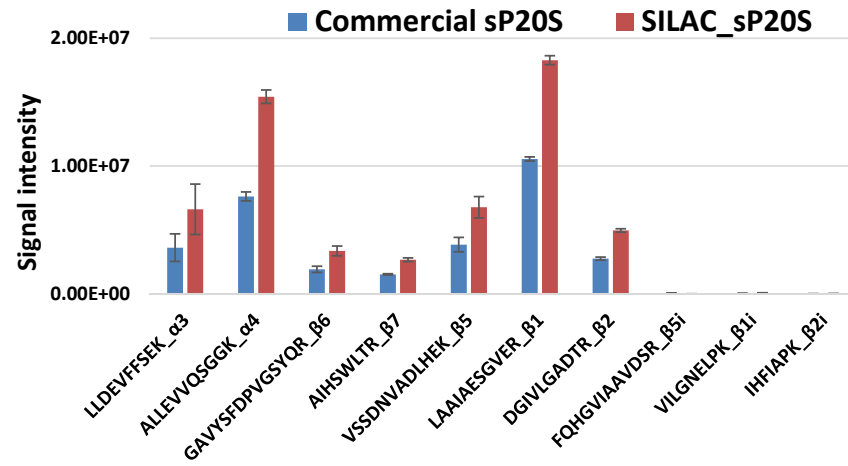

**B**

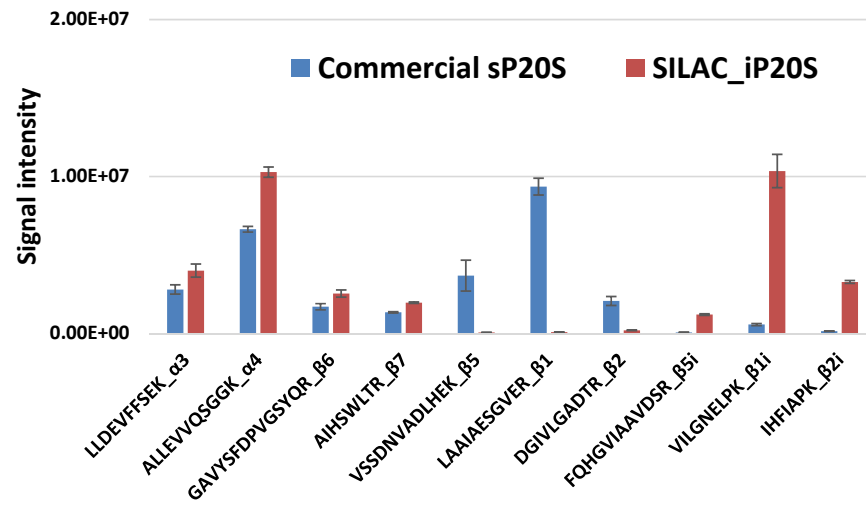

## Sup Figure 5

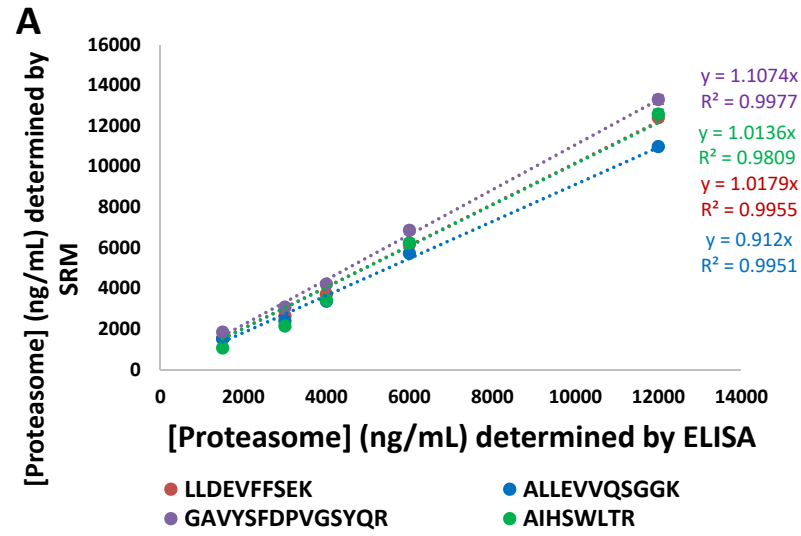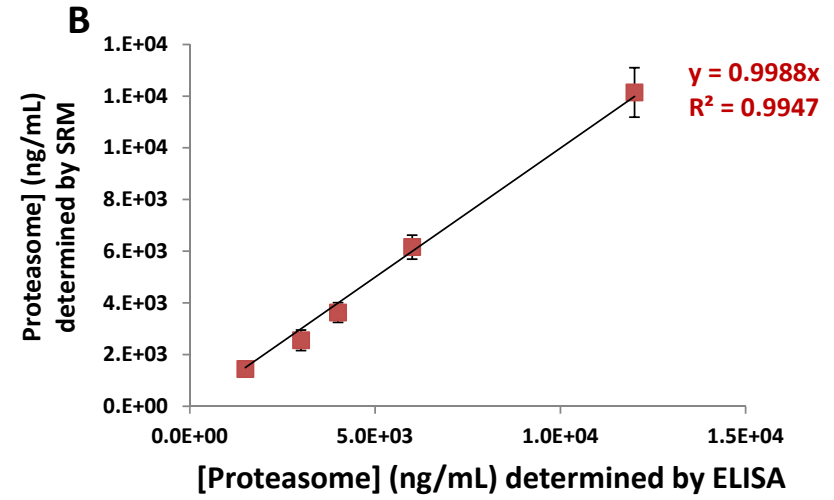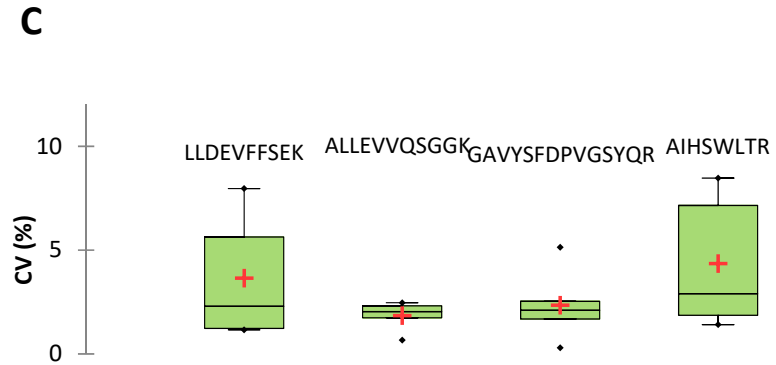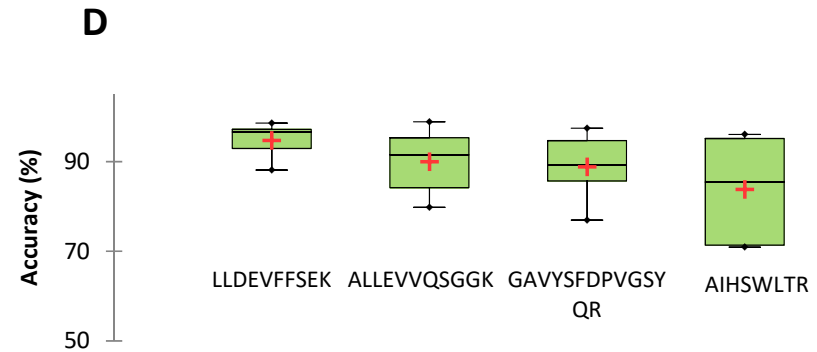

Sup Figure 6  
A

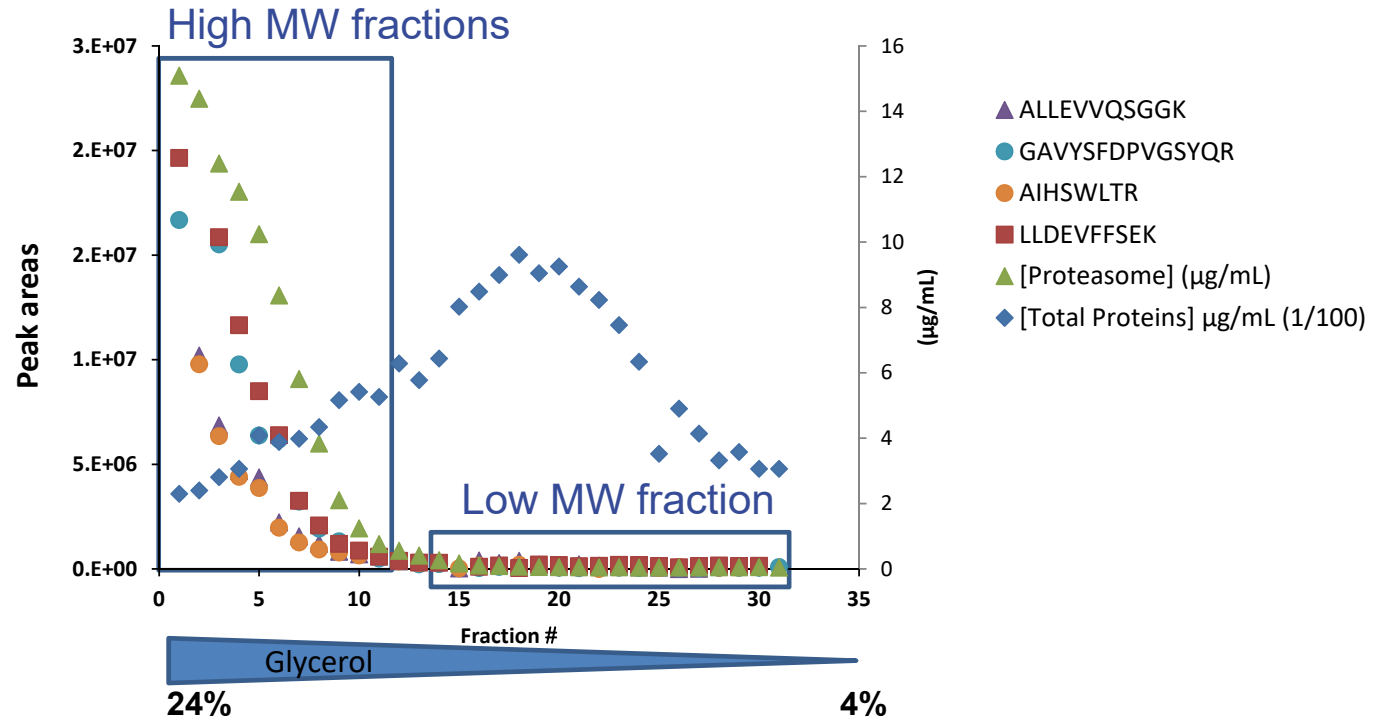

B

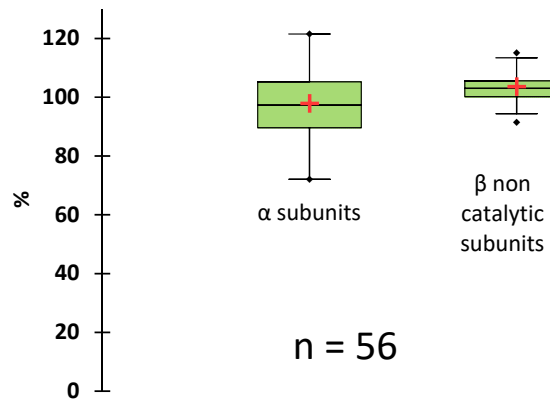

C

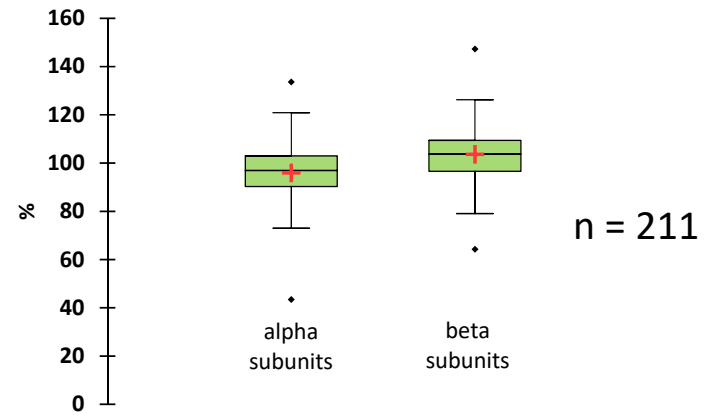

# Sup Figure 7

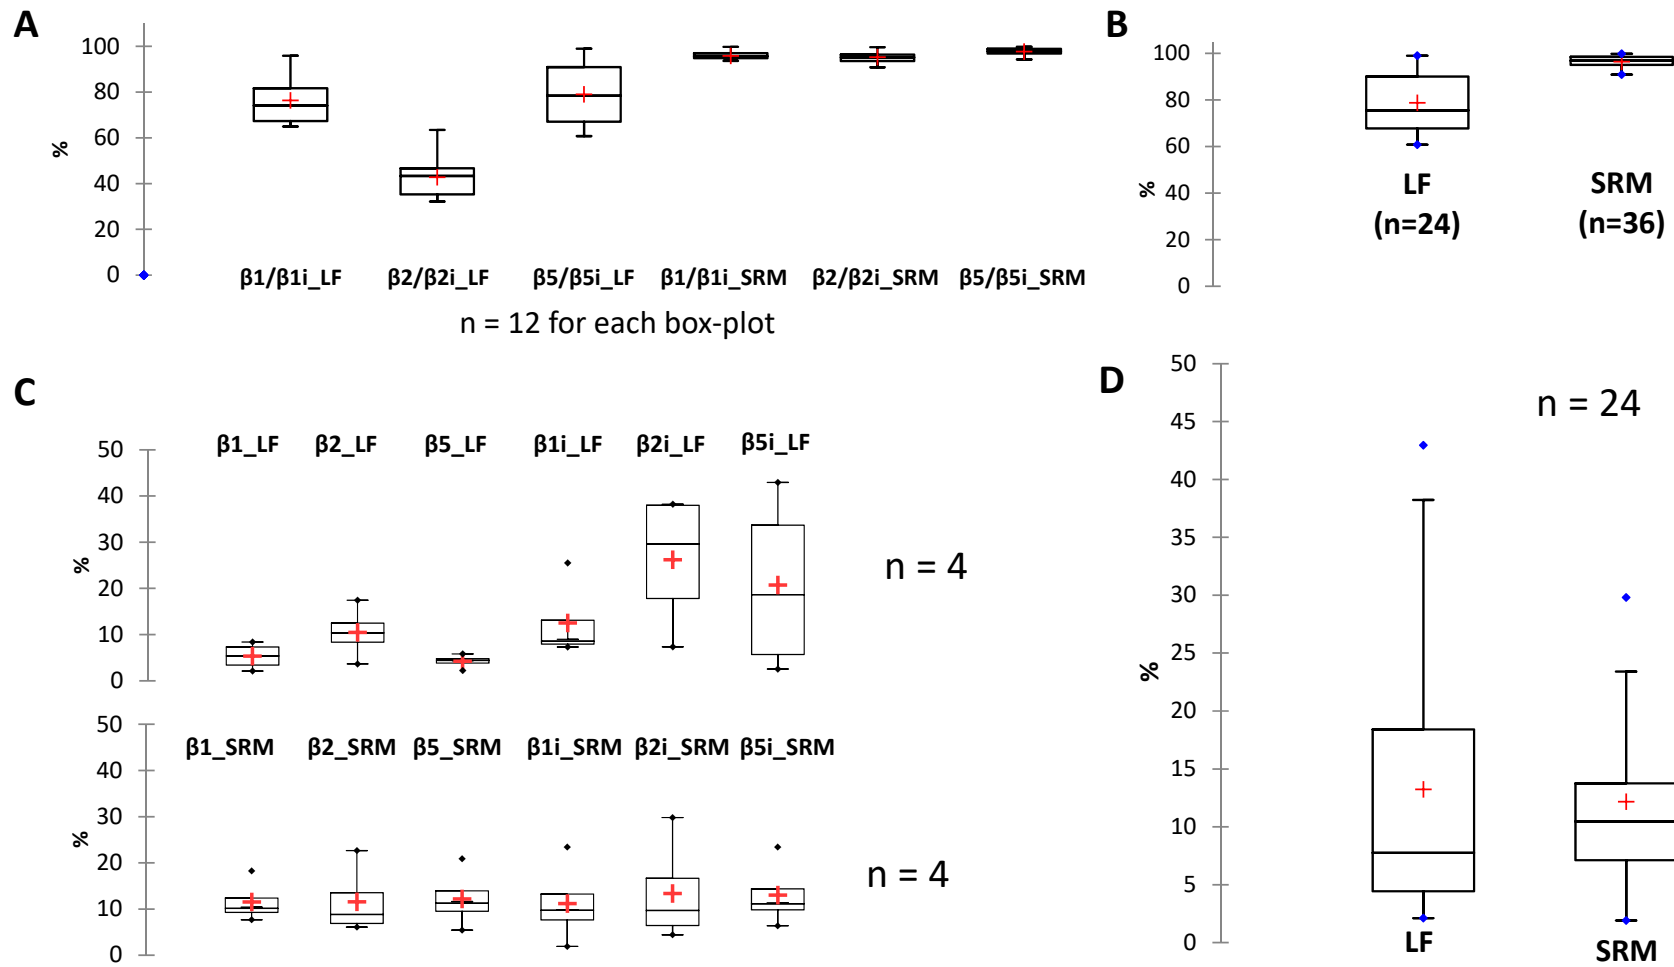

# Sup Figure 8

## A

**Ubiquitous  $\alpha 4$**  : >sp|O14818|PSA7\_HUMAN Proteasome subunit alpha type-7  
OS=Homo sapiens GN=PSMA7 PE=1 SV=1  
MSYDRAITVFS**PDGHLFQVEYAQ**EAVKKGSTAVGVRGRDIVVLGVEKKSVAKLQDERTVR  
KICALDDNVCMFAFGLTADARIVINRARVEQC**SHRLTV**EDP**VTVEY**ITR**Y**IASLKQRYTQSN  
GRR**PFGISALIVGFDFDGT**PRLYQTDP**SGTYHAWKANA**IGRGAKSVREFLEK**NYTDEA**IET  
**DDLTIK**LV**IKALLEVVQ**SGGKN**I**ELAVMRRDQSL**KILNPE**EIEKYVAEIEKEEENEK**KKQ**KAS  
**Testis-specific  $\alpha 4$  called  $\alpha 4s$**  : >sp|Q8TAA3|PSA7L\_HUMAN Proteasome subunit alpha type-7-like  
OS=Homo sapiens GN=PSMA8 PE=2 SV=3  
MASRYDRAITVFS**PDGHLFQVEYAQ**EAVKKGSTAVGIRGTNIVVLGVEKKSVAKLQDERT  
VRKICALDDHVCMFAFVLTIFIGLTADARVVINRARVEQC**SHKLT**VED**PVTVEY**ITR**F**FIATLK  
QKYTQSNRR**PFGISALIVGFDD**DGISRLYQTDP**SGTYHAWKANA**IGRSAKTVREFLEK**NY**  
TEDA**IASD**SEAIK**LAIKALLEVVQ**SGGKN**I**ELAIIRRNQPLKM**FSAKEV**ELYVTEIEK**EKEE**AEK  
KKS**K**SV

Peptides common to  $\alpha 4$  and  $\alpha 4s$  → total  $\alpha 4$  position subunit quantity  
Peptides specific to  $\alpha 4$  (PSMA7) → used to deduce  $\alpha 4s$  absolute quantity

| PSA7_HUMAN | PSMA8_HUMAN | MSYDRAITVFS | PDGHLFQVEYAQ | EAVKKGSTAVGVRGRDIVVLGVEKKSVAKLQDERT |     |
|------------|-------------|-------------|--------------|-------------------------------------|-----|
| 014818     | Q8TAA3      | 1           | 1            | 58                                  | 60  |
| 014818     | Q8TAA3      | 59          | 61           | 112                                 | 120 |
| 014818     | Q8TAA3      | 113         | 121          | 172                                 | 180 |
| 014818     | Q8TAA3      | 173         | 181          | 232                                 | 240 |
| 014818     | Q8TAA3      | 233         | 241          | 248                                 | 256 |

## C

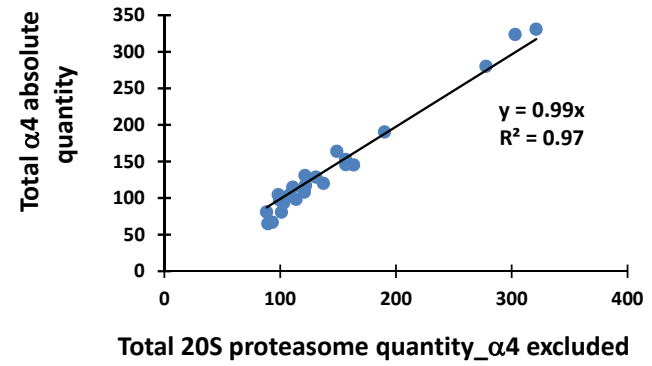

## D

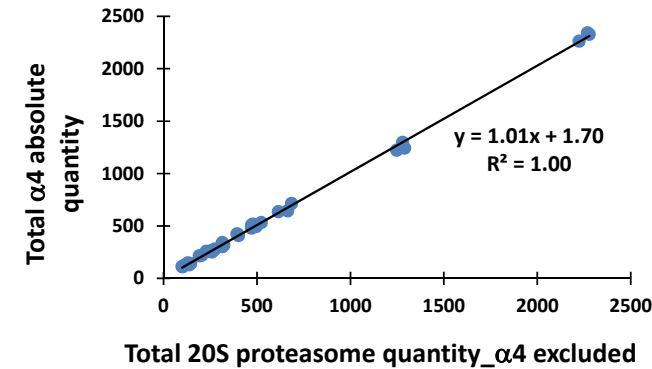



## Sup Figure 9

**A**

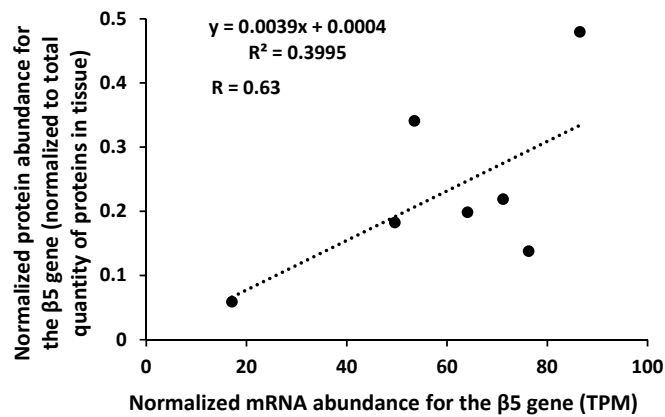

**B**

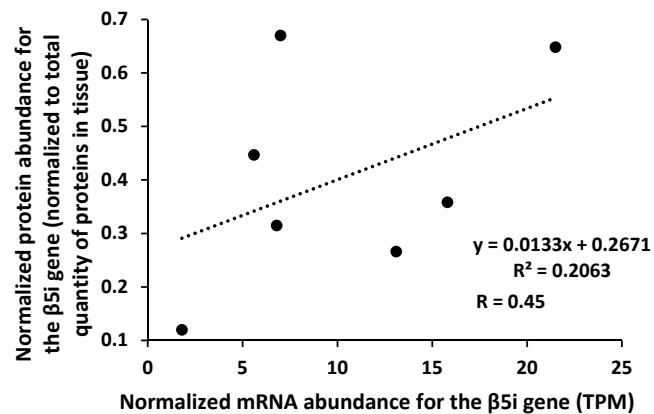

**C**

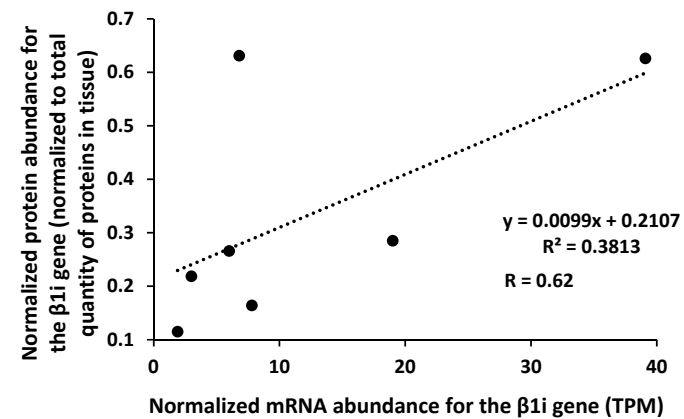

**D**

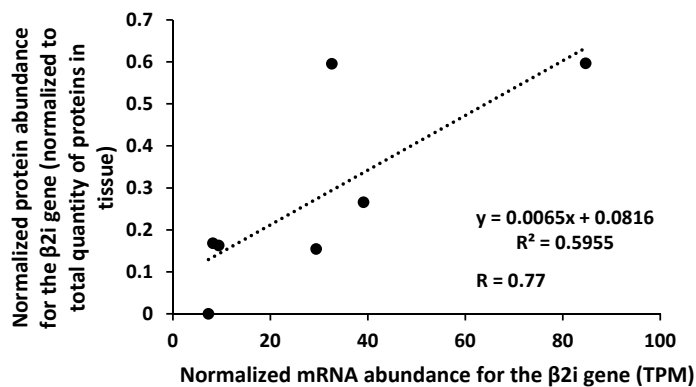

**E**

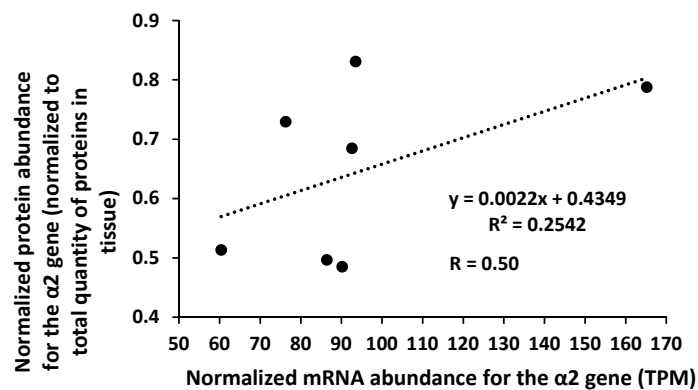

**F**

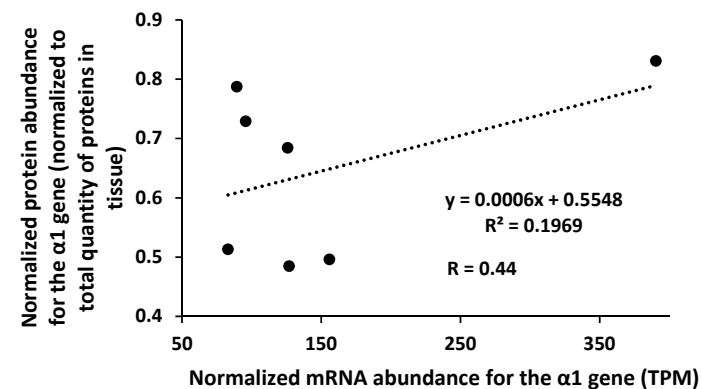

# Sup Figure 10

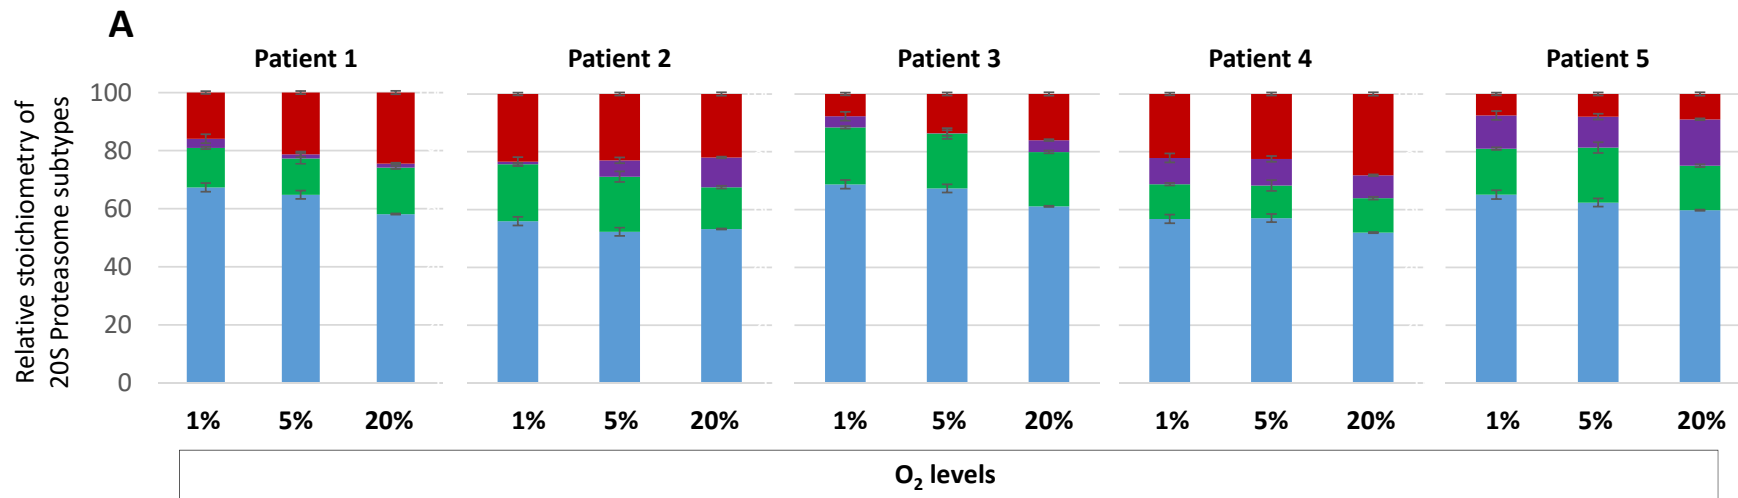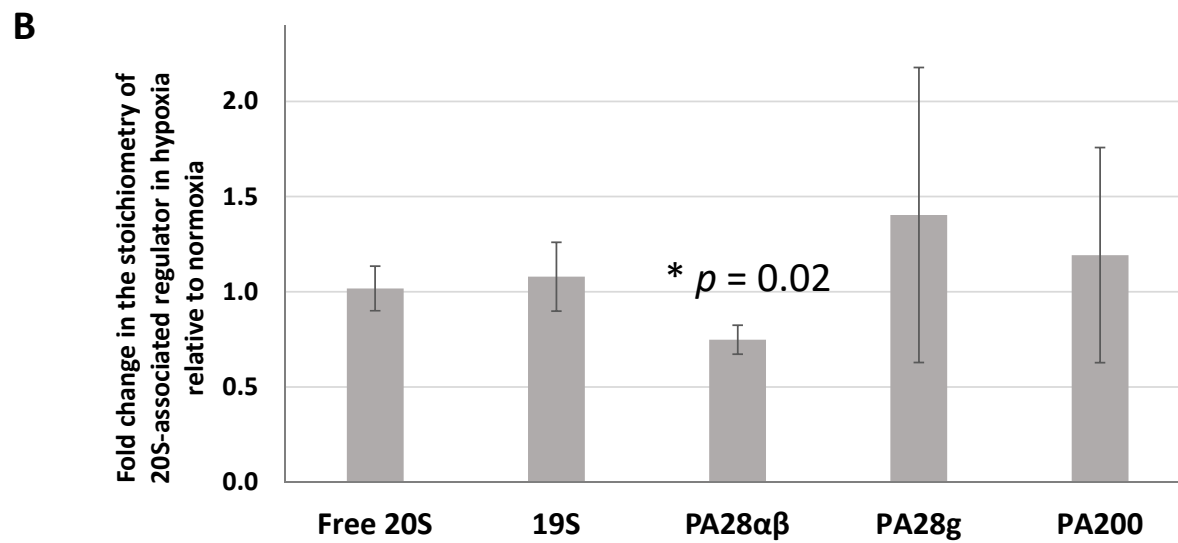

# Sup Figure 11

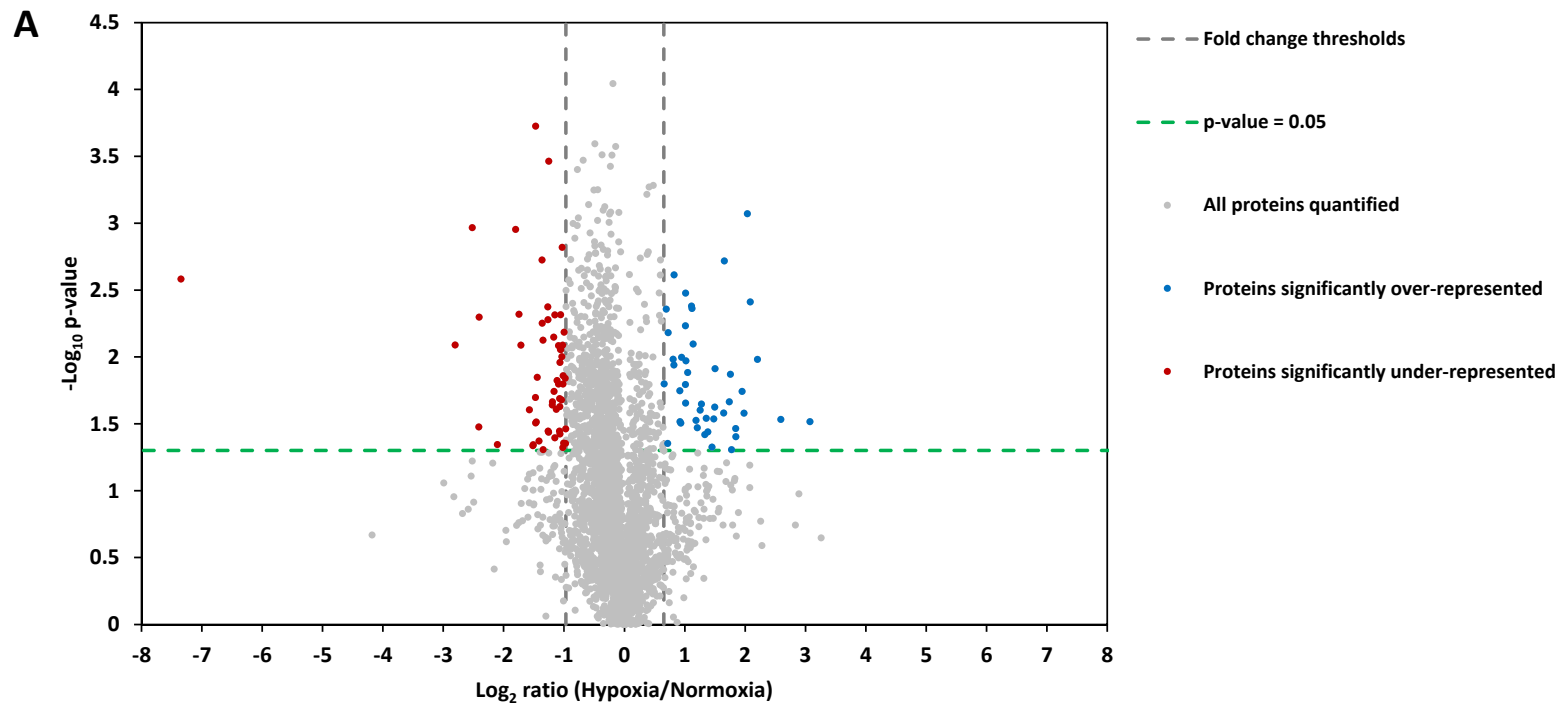

**B** **GO biological processes over-represented in Normoxia**

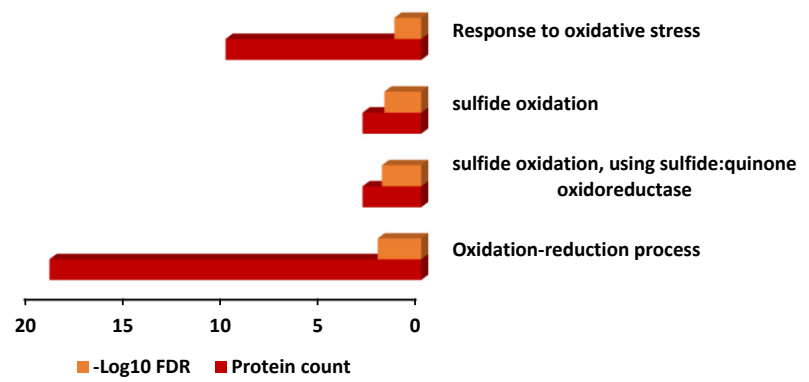

**C** **GO biological processes over-represented in Hypoxia**

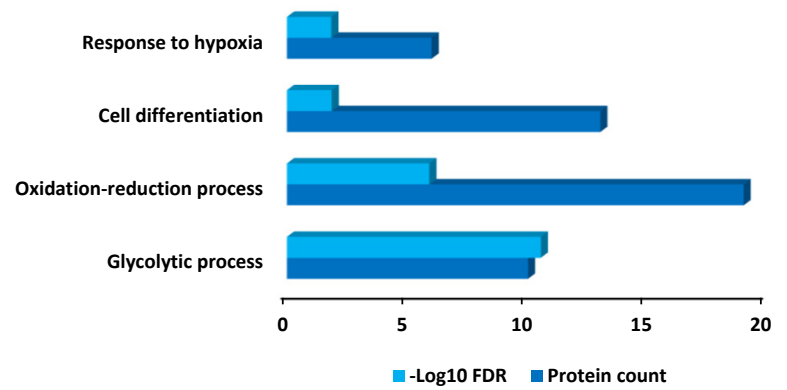

Supplement: 139223_1_supp_270975_plj9gm.pdf [file 139223_1_supp_270975_plj9gm.pdf]
